# Supplementary material
Source: MDPI journal article supplement (https://www.mdpi.com/2073-4395/11/6/1203)
Supplement: s1 [file s1]

## Supplementary material

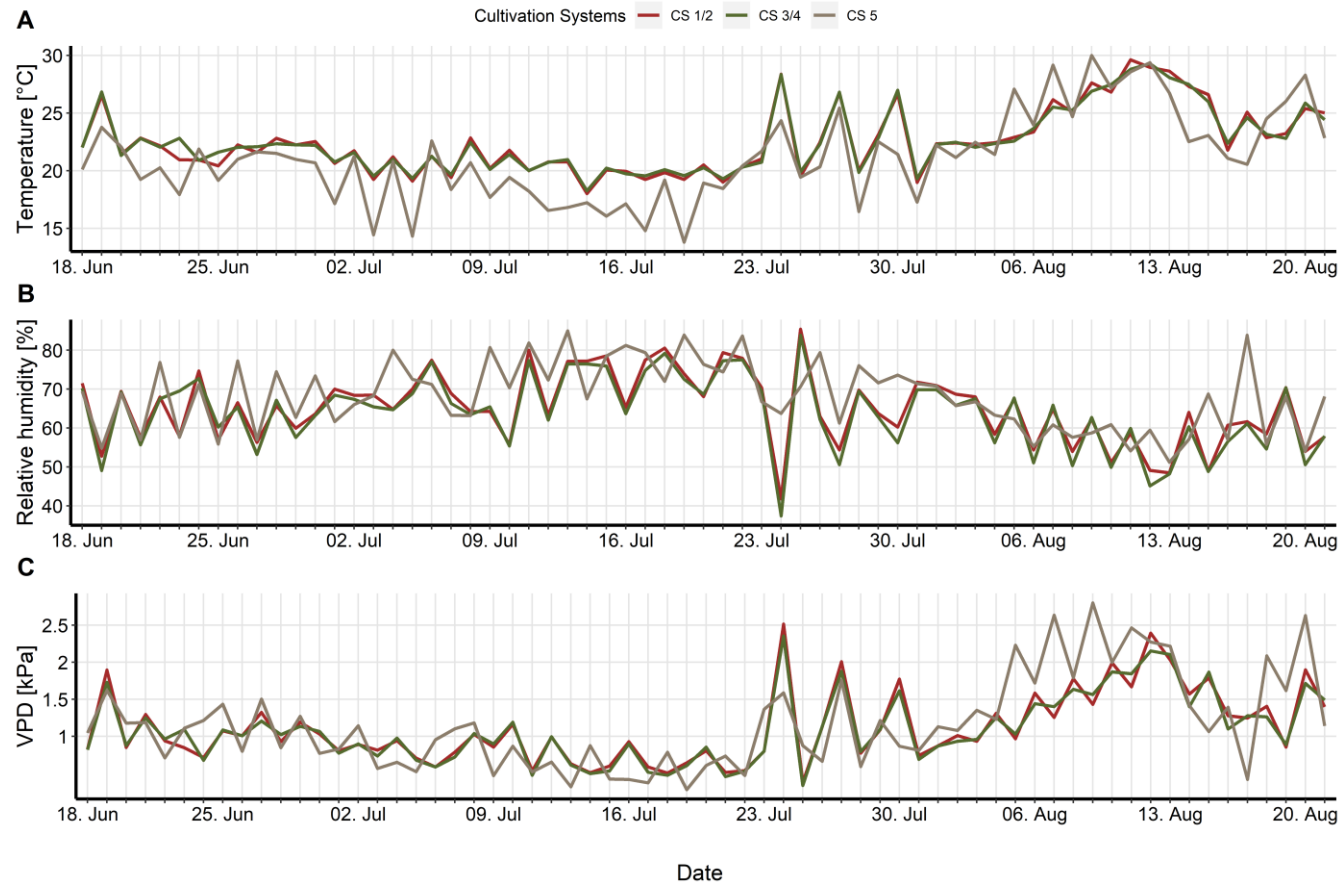

**Figure S1.** Mean daily values in the five cultivation systems of (A) temperature [°C], (B) relative humidity [%], and (C) vapor pressure deficit (VPD) [kPa] over the entire period of fruit growth.

**Table S1.** Mean values of yield parameters  $\pm$  standard deviation in different cultivation systems of five breeding lines and Lyterno F1.

| Cultivation system (CS)                                 |                |                |                |                | Breeding line (BL)/Cultivar (CV) |               |                |                |               |               | BL/CV x CS    |     |     |
|---------------------------------------------------------|----------------|----------------|----------------|----------------|----------------------------------|---------------|----------------|----------------|---------------|---------------|---------------|-----|-----|
| 1                                                       | 2              | 3              | 4              | 5              |                                  | 1             | 2              | 3              | 4             | 5             | 6             |     |     |
| <b>trusses up to 2.5 m</b>                              |                |                |                |                |                                  |               |                |                |               |               |               |     |     |
| 9.43                                                    | 8.90           | 9.12           | 8.28           | 10.39          | ***                              | 8.47          | 8.05           | 10.16          | 10.9          | 9.23          | 8.54          | *** | *   |
| $\pm 1.39$ b                                            | $\pm 1.25$ b   | $\pm 1.30$ b   | $\pm 1.06$ c   | $\pm 1.31$ a   |                                  | $\pm 1.02$ d  | $\pm 1.09$ d   | $\pm 0.76$ b   | $\pm 1.50$ a  | $\pm 0.86$ c  | $\pm 0.73$ d  |     |     |
| <b>trusses per week since planting</b>                  |                |                |                |                |                                  |               |                |                |               |               |               |     |     |
| 0.92                                                    | 0.89           | 0.93           | 0.83           | 0.72           | ***                              | 0.73          | 0.75           | 0.88           | 1.00          | 0.87          | 0.91          | *** | *   |
| $\pm 0.13$ a                                            | $\pm 0.14$ a   | $\pm 0.12$ a   | $\pm 0.13$ b   | $\pm 0.10$ c   |                                  | $\pm 0.09$ c  | $\pm 0.09$ c   | $\pm 0.15$ b   | $\pm 0.13$ a  | $\pm 0.09$ b  | $\pm 0.12$ b  |     |     |
| <b>time from planting to 2.5 m plant height [weeks]</b> |                |                |                |                |                                  |               |                |                |               |               |               |     |     |
| 10.3                                                    | 10.1           | 9.89           | 9.92           | 14.73          | ***                              | 11.93         | 10.89          | 11.63          | 11.09         | 10.7          | 9.67          | *** | ns  |
| $\pm 0.80$ b                                            | $\pm 1.06$ b   | $\pm 0.96$ b   | $\pm 0.92$ b   | $\pm 1.49$ a   |                                  | $\pm 2.27$ a  | $\pm 2.08$ c   | $\pm 2.09$ ab  | $\pm 2.27$ bc | $\pm 1.48$ c  | $\pm 2.17$ d  |     |     |
| <b>single fruit weight [g]</b>                          |                |                |                |                |                                  |               |                |                |               |               |               |     |     |
| 62.82                                                   | 53.4           | 52.3           | 51.88          | 68.71          | ***                              | 59.47         | 68.47          | 61.6           | 18.47         | 34.87         | 104.05        | *** | *** |
| $\pm 32.46$ a                                           | $\pm 25.30$ b  | $\pm 25.67$ b  | $\pm 26.29$ b  | $\pm 34.87$ a  |                                  | $\pm 13.73$ c | $\pm 10.98$ b  | $\pm 13.13$ bc | $\pm 3.55$ e  | $\pm 4.95$ d  | $\pm 18.85$ a |     |     |
| <b>yield [g per week and plant since planting]</b>      |                |                |                |                |                                  |               |                |                |               |               |               |     |     |
| 359.43                                                  | 295.28         | 295.89         | 269.07         | 297.4          | ***                              | 262.61        | 305.56         | 327.15         | 186.92        | 184.39        | 553.84        | *** | *   |
| $\pm 166.11$ a                                          | $\pm 127.94$ b | $\pm 132.75$ b | $\pm 131.42$ b | $\pm 128.17$ b |                                  | $\pm 56.03$ c | $\pm 57.52$ bc | $\pm 62.29$ b  | $\pm 43.26$ d | $\pm 36.97$ d | $\pm 99.33$ a |     |     |
| <b>calculated yield [kg per plant]</b>                  |                |                |                |                |                                  |               |                |                |               |               |               |     |     |
| 3.56                                                    | 2.91           | 2.77           | 2.6            | 4.29           | ***                              | 3.00          | 3.28           | 3.78           | 2.03          | 1.94          | 5.30          | *** | *** |
| $\pm 1.47$ b                                            | $\pm 1.12$ c   | $\pm 0.99$ c   | $\pm 1.05$ c   | $\pm 1.72$ a   |                                  | $\pm 0.88$ c  | $\pm 0.71$ c   | $\pm 0.92$ b   | $\pm 0.56$ d  | $\pm 0.36$ d  | $\pm 1.40$ a  |     |     |

ns  $\geq 0.05$ , \*  $< 0.05$ , \*\*  $\leq 0.01$ , \*\*\*  $\leq 0.001$ . Small letters indicate significant differences between either the cultivation systems or the breeding lines/cultivar and their interaction (Tukey's HSD,  $p \leq 0.05$ ).

**Table S2.** Soil analyses in the low-input cultivation system (CS 5) before and after the experimental setup.

| soil sample                    | soil depth [cm] | Use              | Soil texture (Group) | Calcium carbonate pH-value  |                              | Phosphorus [mg/100g] | Potassium [mg/100g] | Magnesium [mg/100g] |
|--------------------------------|-----------------|------------------|----------------------|-----------------------------|------------------------------|----------------------|---------------------|---------------------|
|                                |                 |                  |                      | to target CaCl <sub>2</sub> | determined CaCl <sub>2</sub> | CAL                  | CAL                 | CaCl <sub>2</sub>   |
| 03.06.2019 start of experiment | 0 – 30          | Agricultural use | (h) ttU              | 6.3-7.0                     | 7.0 C                        | 4.6 C                | 11.7 C              | 13.6 D              |
| 08.10.2019 end of experiment   | 0 – 30          | Agricultural use | (h) ttU              | 6.3-7.0                     | 7.0 C                        | 4.4 B                | 9.1 B               | 13.3 D              |

A = very low, B = low, C = to target, D = high, E = very high, F = extremely high; results were measured and provided by the LUFA Nord-West (Germany). (h) = low humus to humous, ttU = strong clayey silt.

**Table S3.** Mean values ± standard deviation of 18 aroma compounds in different cultivation systems of five breeding lines and Lyterno F1.

|                          | Cultivation system (CS) |                   |                  |                   |                  |     | Breeding Line (BL)/ Cultivar (CV) |                  |                   |                  |                  |                  |     | CS × BL/CV |
|--------------------------|-------------------------|-------------------|------------------|-------------------|------------------|-----|-----------------------------------|------------------|-------------------|------------------|------------------|------------------|-----|------------|
|                          | 1                       | 2                 | 3                | 4                 | 5                |     | 1                                 | 2                | 3                 | 4                | 5                | 6                |     |            |
| [ng/ml sample]           |                         |                   |                  |                   |                  |     |                                   |                  |                   |                  |                  |                  |     |            |
| 1-Penten-3-one           | 0.006<br>±0.00 ab       | 0.006<br>±0.00 ab | 0.006<br>±0.00 a | 0.005<br>±0.00 ab | 0.004<br>±0.00 b | *   | 0.005<br>±0.00 b                  | 0.005<br>±0.00 b | 0.006<br>±0.00 ab | 0.003<br>±0.00 c | 0.005<br>±0.00 b | 0.008<br>±0.00 a | *** | ns         |
| Hexanal*                 | 6.54<br>±3.60 ab        | 5.93<br>±3.87 b   | 7.31<br>±6.12 ab | 7.88<br>±3.46 a   | 8.19<br>±4.41 a  | **  | 14.25<br>±5.14 a                  | 5.17<br>±1.76 c  | 6.57<br>±2.48 bc  | 7.47<br>±2.22 b  | 6.62<br>±2.77 bc | 3.34<br>±1.82 d  | *** | ns         |
| Z-3-Hexenal*             | 1.91<br>±0.64 a         | 1.25<br>±0.59 b   | 1.64<br>±0.81 ab | 1.28<br>±0.52 b   | 1.51<br>±0.72 ab | *** | 1.79<br>±0.63 a                   | 1.66<br>±0.63 ab | 1.2<br>±0.35 b    | 1.93<br>±0.68 a  | 1.71<br>±0.79 ab | 0.86<br>±0.38 c  | *** | ns         |
| E-2-Hexenal*             | 4.75<br>±2.20 a         | 3.18<br>±1.39 b   | 4.7<br>±2.13 a   | 4.51<br>±1.81 a   | 4.30<br>±1.58 a  | *** | 6.43<br>±1.61 a                   | 4.65<br>±1.05 b  | 3.97<br>±0.99 b   | 6.05<br>±1.06 a  | 2.93<br>±0.66 c  | 1.86<br>±0.55 d  | *** | ns         |
| 6-Methyl-5-hepten-2-one* | 2.72<br>±1.21 a         | 3.02<br>±1.36 a   | 3.09<br>±1.31 a  | 2.39<br>±0.86 a   | 4.00<br>±2.55 a  | ns  | 3.61<br>±2.00 ab                  | 3.20<br>±2.40 ab | 3.79<br>±1.38 a   | 2.50<br>±0.90 ab | 2.31<br>±1.09 b  | 2.88<br>±1.15 ab | **  | ns         |

|                         |                   |                   |                  |                   |                   |     |                  |                   |                  |                  |                  |                  |     |     |
|-------------------------|-------------------|-------------------|------------------|-------------------|-------------------|-----|------------------|-------------------|------------------|------------------|------------------|------------------|-----|-----|
| 1-Hexanol               | 0.11<br>±0.06 b   | 0.17<br>±0.11 a   | 0.10<br>±0.07 b  | 0.13<br>±0.09 ab  | 0.18<br>±0.12 a   | *** | 0.17<br>±0.11 ab | 0.07<br>±0.04 c   | 0.11<br>±0.06 b  | 0.15<br>±0.06 ab | 0.23<br>±0.13 a  | 0.11<br>±0.07 b  | *** | ns  |
| Z-3-Hexenol*            | 0.21<br>±0.05 b   | 0.23<br>±0.05 ab  | 0.22<br>±0.05 ab | 0.25<br>±0.03 a   | 0.24<br>±0.05 a   | **  | 0.29<br>±0.05 a  | 0.22<br>±0.03 bc  | 0.20<br>±0.04 c  | 0.21<br>±0.03 bc | 0.23<br>±0.04 bc | 0.23<br>±0.03 b  | *** | ns  |
| 2-Isobutylthiazole*     | 2.17<br>±1.89 b   | 2.20<br>±2.43 b   | 2.10<br>±1.38 b  | 2.18<br>±1.53 b   | 3.23<br>±2.26 a   | **  | 0.53<br>±0.33 d  | 2.53<br>±1.70 b   | 4.47<br>±2.45 a  | 1.04<br>±0.53 c  | 2.23<br>±0.95 b  | 3.38<br>±1.59 ab | *** | *   |
| Benzaldehyde            | 0.13<br>±0.04 b   | 0.17<br>±0.05 a   | 0.13<br>±0.05 b  | 0.14<br>±0.06 b   | 0.09<br>±0.03 c   | *** | 0.09<br>±0.04 b  | 0.15<br>±0.06 a   | 0.15<br>±0.07 a  | 0.15<br>±0.04 a  | 0.16<br>±0.03 a  | 0.10<br>±0.05 b  | *** | *** |
| Phenyl<br>acetaldehyde* | 0.08<br>±0.03 a   | 0.09<br>±0.04 a   | 0.09<br>±0.04 a  | 0.07<br>±0.03 a   | 0.09<br>±0.04 a   | ns  | 0.13<br>±0.06 a  | 0.07<br>±0.02 c   | 0.08<br>±0.02 bc | 0.07<br>±0.02 bc | 0.08<br>±0.02 b  | 0.08<br>±0.02 bc | *** | ns  |
| Neral                   | 0.05<br>±0.04 ab  | 0.06<br>±0.04 a   | 0.04<br>±0.03 ab | 0.04<br>±0.03 b   | 0.05<br>±0.04 ab  | *   | 0.03<br>±0.02 c  | 0.04<br>±0.03 ab  | 0.04<br>±0.02 b  | 0.03<br>±0.01 bc | 0.11<br>±0.03 a  | 0.03<br>±0.02 bc | *** | ns  |
| Geranial                | 0.33<br>±0.19 a   | 0.29<br>±0.11 a   | 0.32<br>±0.15 a  | 0.14<br>±0.04 b   | 0.23<br>±0.09 a   | *** | 0.24<br>±0.13 a  | 0.28<br>±0.22 a   | 0.31<br>±0.14 a  | 0.24<br>±0.12 a  | 0.25<br>±0.09 a  | 0.26<br>±0.13 a  | ns  | ns  |
| Methyl salicylate*      | 0.10<br>±0.15 a   | 0.19<br>±0.35 a   | 0.10<br>±0.13 a  | 0.09<br>±0.12 a   | 0.17<br>±0.23 a   | ns  | 0.15<br>±0.21 b  | 0.23<br>±0.21 a   | 0.34<br>±0.33 a  | 0.04<br>±0.01 bc | 0.02<br>±0.02 c  | 0.01<br>±0.01 d  | *** | ns  |
| β-Damascenone           | 0.17<br>±0.12 a   | 0.14<br>±0.06 a   | 0.19<br>±0.16 a  | 0.22<br>±0.19 a   | 0.14<br>±0.06 a   | ns  | 0.14<br>±0.04 b  | 0.1<br>±0.03 b    | 0.11<br>±0.03 b  | 0.31<br>±0.22 a  | 0.23<br>±0.13 a  | 0.13<br>±0.05 b  | *** | *   |
| Z-Geranylacetone*       | 0.020<br>±0.01 ab | 0.018<br>±0.01 ab | 0.025<br>±0.01 a | 0.017<br>±0.01 b  | 0.018<br>±0.01 ab | *   | 0.028<br>±0.01 a | 0.022<br>±0.01 ab | 0.018<br>±0.01 b | 0.019<br>±0.01 b | 0.019<br>±0.01 b | 0.012<br>±0.00 c | *** | ns  |
| E-Geranylacetone*       | 2.18<br>±1.02 ab  | 2.07<br>±1.20 ab  | 2.36<br>±1.38 a  | 1.77<br>±0.61 ab  | 1.70<br>±0.93 b   | *   | 3.30<br>±1.52 a  | 2.22<br>±1.03 b   | 2.07<br>±0.44 b  | 1.37<br>±0.51 c  | 1.84<br>±0.70 bc | 1.35<br>±0.54 c  | *** | ns  |
| 2-Phenylethanol*        | 0.38<br>±0.14 bc  | 0.47<br>±0.21 a   | 0.35<br>±0.14 c  | 0.44<br>±0.21 abc | 0.45<br>±0.24 ab  | **  | 0.19<br>±0.13 d  | 0.26<br>±0.11 c   | 0.62<br>±0.16 a  | 0.49<br>±0.08 ab | 0.53<br>±0.16 ab | 0.40<br>±0.08 b  | *** | ns  |
| β-Ionone*               | 0.38<br>±0.22 ab  | 0.29<br>±0.17 bc  | 0.40<br>±0.24 ab | 0.27<br>±0.12 c   | 0.29<br>±0.17 bc  | **  | 0.64<br>±0.25 a  | 0.28<br>±0.08 b   | 0.27<br>±0.07 b  | 0.34<br>±0.10 b  | 0.27<br>±0.09 b  | 0.18<br>±0.05 c  | *** | ns  |

ns ≥ 0.05, \* < 0.05, \*\* ≤ 0.01, \*\*\* ≤ 0.001. Small letters indicate significant differences between either the cultivation systems or the breeding lines/cultivar (Tukey's HSD, p ≤ 0.05). Aroma volatiles marked with an asterisk [\*] were considered as main aroma compounds according to Cebolla-Cornejo et al. [32].

**Table S4.** Mean values in percent  $\pm$  standard deviation of sensory panel results in the cultivation systems CS1 and CS2 of five breeding lines and Lyterno F1.

|                       | Cultivation system (CS) |             |    | Breeding Line (BL)/Cultivar (CV) |                |                |                |               |                | CS $\times$ BL/CV |    |
|-----------------------|-------------------------|-------------|----|----------------------------------|----------------|----------------|----------------|---------------|----------------|-------------------|----|
|                       | 1                       | 2           |    | 1                                | 2              | 3              | 4              | 5             | 6              |                   |    |
| Overall odor          | 62.10                   | 62.67       | ns | 60.42                            | 62.70          | 65.24          | 61.74          | 63.08         | 61.13          | ns                | ns |
|                       | $\pm 9.68$              | $\pm 10.49$ |    | $\pm 10.05$                      | $\pm 10.74$    | $\pm 9.69$     | $\pm 8.79$     | $\pm 9.44$    | $\pm 11.43$    |                   |    |
| Grassy green odor     | 51.66                   | 50.49       | ns | 50.26                            | 50.69          | 54.05          | 51.55          | 50.15         | 49.76          | ns                | ns |
|                       | $\pm 8.93$              | $\pm 9.44$  |    | $\pm 9.59$                       | $\pm 10.43$    | $\pm 7.72$     | $\pm 7.59$     | $\pm 8.31$    | $\pm 10.86$    |                   |    |
| Tomato-typical odor   | 56.40                   | 58.21       | ns | 55.70                            | 59.53          | 58.69          | 57.41          | 58.01         | 54.53          | ns                | ns |
|                       | $\pm 12.01$             | $\pm 12.41$ |    | $\pm 11.83$                      | $\pm 12.55$    | $\pm 13.08$    | $\pm 11.15$    | $\pm 9.64$    | $\pm 14.51$    |                   |    |
| Overall flavor        | 62.79                   | 64.15       | ns | 60.51                            | 60.19          | 61.41          | 67.86          | 69.68         | 61.19          | ***               | ns |
|                       | $\pm 10.33$             | $\pm 10.90$ |    | $\pm 9.81$ b                     | $\pm 10.26$ b  | $\pm 10.59$ b  | $\pm 10.04$ a  | $\pm 9.49$ a  | $\pm 9.86$ b   |                   |    |
| Tomato-typical flavor | 58.73                   | 60.59       | ns | 57.69                            | 58.85          | 57.61          | 63.43          | 61.51         | 58.89          | ns                | ns |
|                       | $\pm 12.02$             | $\pm 13.21$ |    | $\pm 10.61$                      | $\pm 10.50$    | $\pm 15.14$    | $\pm 12.13$    | $\pm 13.30$   | $\pm 13.22$    |                   |    |
| Fruity flavor         | 40.88                   | 40.09       | ns | 40.54                            | 38.81          | 35.81          | 45.91          | 46.77         | 35.08          | ***               | ns |
|                       | $\pm 13.69$             | $\pm 13.93$ |    | $\pm 11.99$ ab                   | $\pm 13.11$ ab | $\pm 11.65$ b  | $\pm 12.72$ a  | $\pm 13.82$ a | $\pm 15.31$ b  |                   |    |
| Sweetness             | 31.63                   | 33.34       | ns | 32.65                            | 34.47          | 28.60          | 36.25          | 37.50         | 25.42          | ***               | ns |
|                       | $\pm 12.33$             | $\pm 11.36$ |    | $\pm 10.36$ ab                   | $\pm 9.71$ ab  | $\pm 10.90$ bc | $\pm 12.38$ a  | $\pm 12.40$ a | $\pm 11.13$ c  |                   |    |
| Sourness              | 43.53                   | 41.71       | ns | 39.80                            | 36.76          | 38.35          | 46.51          | 47.09         | 47.20          | ***               | ns |
|                       | $\pm 13.35$             | $\pm 12.87$ |    | $\pm 13.43$ ab                   | $\pm 12.48$ b  | $\pm 12.96$ b  | $\pm 10.90$ a  | $\pm 12.77$ a | $\pm 12.19$ a  |                   |    |
| Bitter                | 20.21                   | 18.91       | ns | 18.22                            | 18.29          | 20.15          | 19.07          | 19.73         | 21.91          | ns                | ns |
|                       | $\pm 8.74$              | $\pm 8.70$  |    | $\pm 8.64$                       | $\pm 7.67$     | $\pm 7.93$     | $\pm 6.87$     | $\pm 8.89$    | $\pm 11.59$    |                   |    |
| Salty                 | 21.19                   | 23.04       | ns | 20.83                            | 20.42          | 20.84          | 23.28          | 23.24         | 24.08          | ns                | ns |
|                       | $\pm 10.33$             | $\pm 11.49$ |    | $\pm 11.47$                      | $\pm 10.39$    | $\pm 10.69$    | $\pm 10.86$    | $\pm 10.70$   | $\pm 11.60$    |                   |    |
| Umami                 | 44.53                   | 44.37       | ns | 43.68                            | 43.66          | 42.24          | 48.80          | 46.51         | 41.82          | ns                | ns |
|                       | $\pm 12.82$             | $\pm 13.65$ |    | $\pm 13.05$                      | $\pm 13.08$    | $\pm 13.55$    | $\pm 12.92$    | $\pm 12.78$   | $\pm 13.31$    |                   |    |
| Juiciness             | 62.20                   | 63.75       | ns | 63.91                            | 53.08          | 60.80          | 69.53          | 73.25         | 57.31          | ***               | ns |
|                       | $\pm 14.36$             | $\pm 12.70$ |    | $\pm 9.15$ bc                    | $\pm 14.85$ d  | $\pm 12.21$ c  | $\pm 8.88$ ab  | $\pm 10.41$ a | $\pm 13.90$ cd |                   |    |
| Skin firmness         | 56.14                   | 53.63       | ns | 54.23                            | 57.32          | 54.09          | 53.59          | 50.60         | 59.48          | *                 | ns |
|                       | $\pm 12.93$             | $\pm 11.78$ |    | $\pm 12.47$ ab                   | $\pm 8.61$ ab  | $\pm 11.70$ ab | $\pm 11.98$ ab | $\pm 15.66$ b | $\pm 11.78$ a  |                   |    |
| Aftertaste            | 47.30                   | 47.25       | ns | 44.90                            | 44.75          | 46.83          | 49.45          | 51.79         | 45.95          | *                 | ns |

|  |        |        |           |          |          |           |         |           |
|--|--------|--------|-----------|----------|----------|-----------|---------|-----------|
|  | ±10.56 | ±11.14 | ±10.55 ab | ±11.74 b | ±9.75 ab | ±10.72 ab | ±9.13 a | ±11.68 ab |
|--|--------|--------|-----------|----------|----------|-----------|---------|-----------|

ns ≥ 0.05, \* < 0.05, \*\* ≤ 0.01, \*\*\* ≤ 0.001. Small letters indicate significant differences between the breeding lines/cultivar (Tukey's HSD, p ≤ 0.05).

**Table S5.** Mean values ± standard deviation of 38 metabolites detected in two breeding lines (2, 3) and Lyterno F1 (6), and the fold change (FC) from cultivation system 4 (double glazed greenhouse without LED) compared to cultivation system 2 (single glazed greenhouse without LED) are shown. Further, mean values ± standard deviation are shown for comparison of the 38 metabolites in the two breeding lines and Lyterno F1.

| [mg/g DW]          | CS2        | CS4        |    | FC   |
|--------------------|------------|------------|----|------|
| <b>Amino acids</b> |            |            |    |      |
| Adenine            | 0.11±0.04  | 0.12±0.06  | ns | 1.08 |
| Adenosine          | 0.49±0.18  | 0.48±0.20  | ns | 0.98 |
| Alanine            | 0.9±0.37   | 0.7±0.13   | ns | 0.77 |
| Asparagine         | 1.96±0.53  | 1.52±0.34  | ** | 0.77 |
| Aspartate          | 7.61±2.45  | 4.6±0.57   | ** | 0.60 |
| Glutamate          | 22.86±4.96 | 15.74±3.10 | ** | 0.69 |
| Glutamine          | 7.58±2.27  | 4.7±1.23   | ** | 0.62 |
| Guanosine          | 0.33±0.07  | 0.26±0.04  | *  | 0.79 |
| Isoleucine         | 0.72±0.21  | 0.53±0.19  | ** | 0.74 |
| Leucine            | 0.6±0.13   | 0.46±0.14  | *  | 0.76 |
| Lysine             | 0.5±0.18   | 0.34±0.06  | *  | 0.69 |
| Phenylalanine      | 1.8±0.46   | 1.46±0.39  | ns | 0.81 |
| Proline            | 0.26±0.10  | 0.19±0.08  | ns | 0.73 |
| Pyroglutamate      | 6.07±2.43  | 3.75±1.09  | ** | 0.62 |
| Serine             | 1.13±0.53  | 0.92±0.32  | ns | 0.82 |
| Threonine          | 0.93±0.30  | 0.81±0.15  | ns | 0.87 |
| Tryptophane        | 0.19±0.09  | 0.16±0.04  | ns | 0.82 |
| Tyrosine           | 0.7±0.25   | 0.58±0.20  | ns | 0.83 |

|                                |              |              |    |      |
|--------------------------------|--------------|--------------|----|------|
| Valine                         | 0.43±0.12    | 0.31±0.10    | *  | 0.72 |
| γ-Amino-butyrate<br>(GABA)     | 6.23±1.79    | 4.37±0.67    | *  | 0.70 |
| <b>Sugars</b>                  |              |              |    |      |
| Arabinose                      | 0.15±0.05    | 0.11±0.02    | *  | 0.76 |
| Fructose <sup>#</sup>          | 227.26±26.82 | 208.46±8.53  | ns | 0.92 |
| Galactose                      | 1.6±0.93     | 1.17±0.66    | ns | 0.73 |
| Glucose <sup>#</sup>           | 208.68±24.78 | 188.08±12.02 | *  | 0.90 |
| Myo-inositol                   | 1.45±0.32    | 1.16±0.45    | *  | 0.80 |
| Raffinose                      | 0.29±0.24    | 0.3±0.20     | ns | 1.06 |
| Ribose                         | 0.16±0.04    | 0.19±0.08    | ns | 1.21 |
| <b>Organic acids</b>           |              |              |    |      |
| Acetate                        | 0.35±0.19    | 0.23±0.06    | ns | 0.66 |
| Citrate                        | 48.44±23.26  | 40.78±7.60   | ns | 0.84 |
| Formate                        | 0.11±0.02    | 0.1±0.02     | ns | 0.93 |
| Fumarate                       | 0.02±0.01    | 0.01±0.01    | ns | 0.76 |
| Propionate                     | 0.05±0.04    | 0.04±0.02    | ns | 0.69 |
| Quinate                        | 0.5±0.16     | 0.5±0.13     | ns | 1.00 |
| <b>Other organic compounds</b> |              |              |    |      |
| 2,3-Butanediol                 | 0.03±0.02    | 0.03±0.01    | ns | 0.92 |
| Acetone                        | 0.02±0.01    | 0.02±0.01    | ns | 1.27 |
| Choline                        | 1.2±0.24     | 1.01±0.26    | ns | 0.85 |
| Ethanol                        | 0.02±0.01    | 0.02±0.01    | ns | 1.17 |
| Methanol                       | 0.77±0.24    | 0.62±0.27    | ns | 0.80 |

ns ≥ 0.05, \* < 0.05, \*\* ≤ 0.01, \*\*\* ≤ 0.001. Small letters indicate significant differences between either the cultivation systems or the breeding lines (Tukey's HSD, p ≤ 0.05). # Fructose and Glucose values are measured with HPLC.
